# Supplementary material
Source: PubMed Central journal article supplement (PMC6004252)

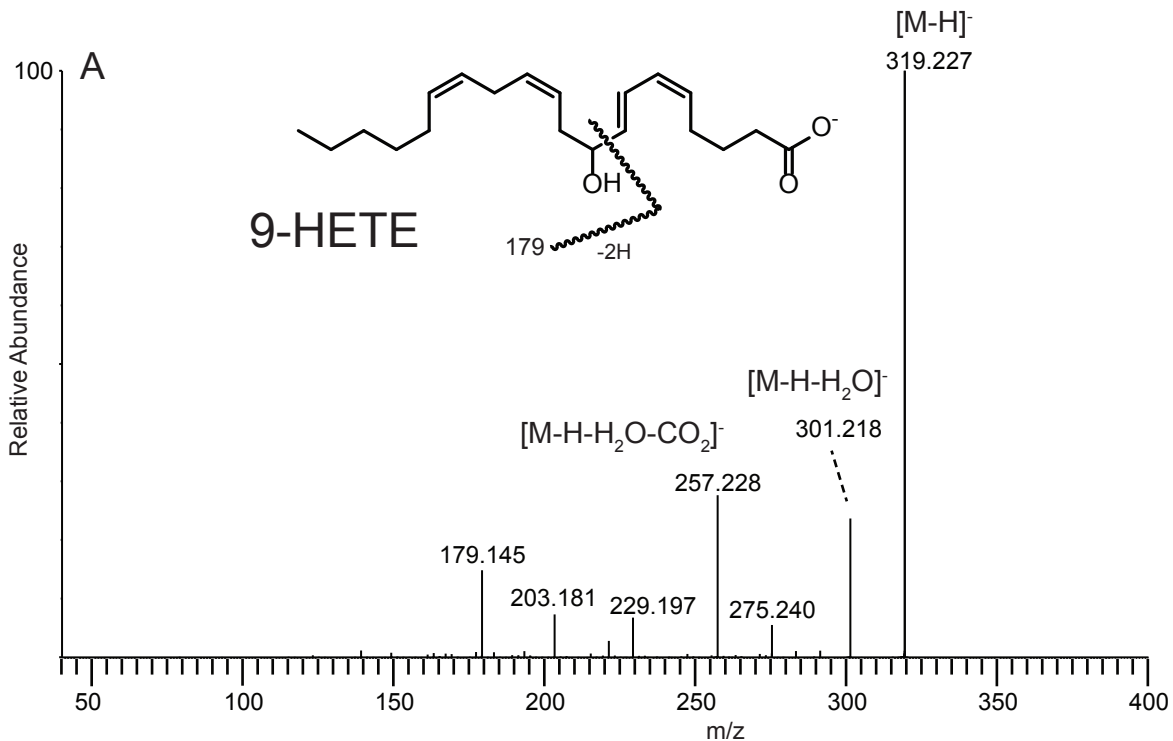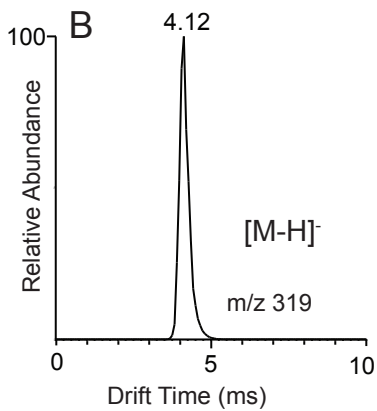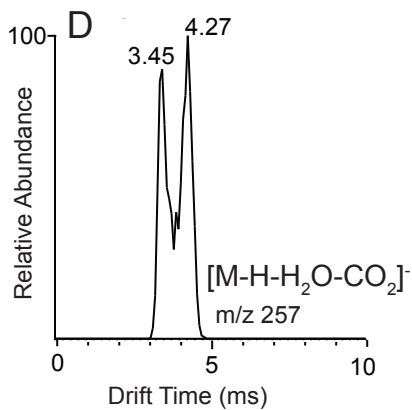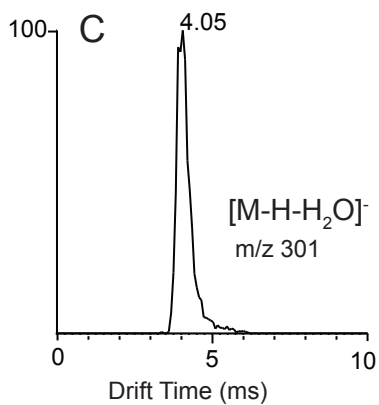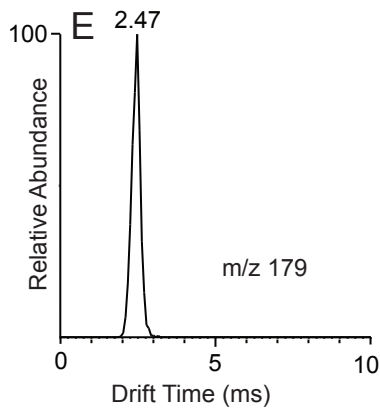

Supplement: NIHMS962359-supplement-13361_2018_1927_MOESM3_ESM.pdf [file NIHMS962359-supplement-13361_2018_1927_MOESM3_ESM.pdf]

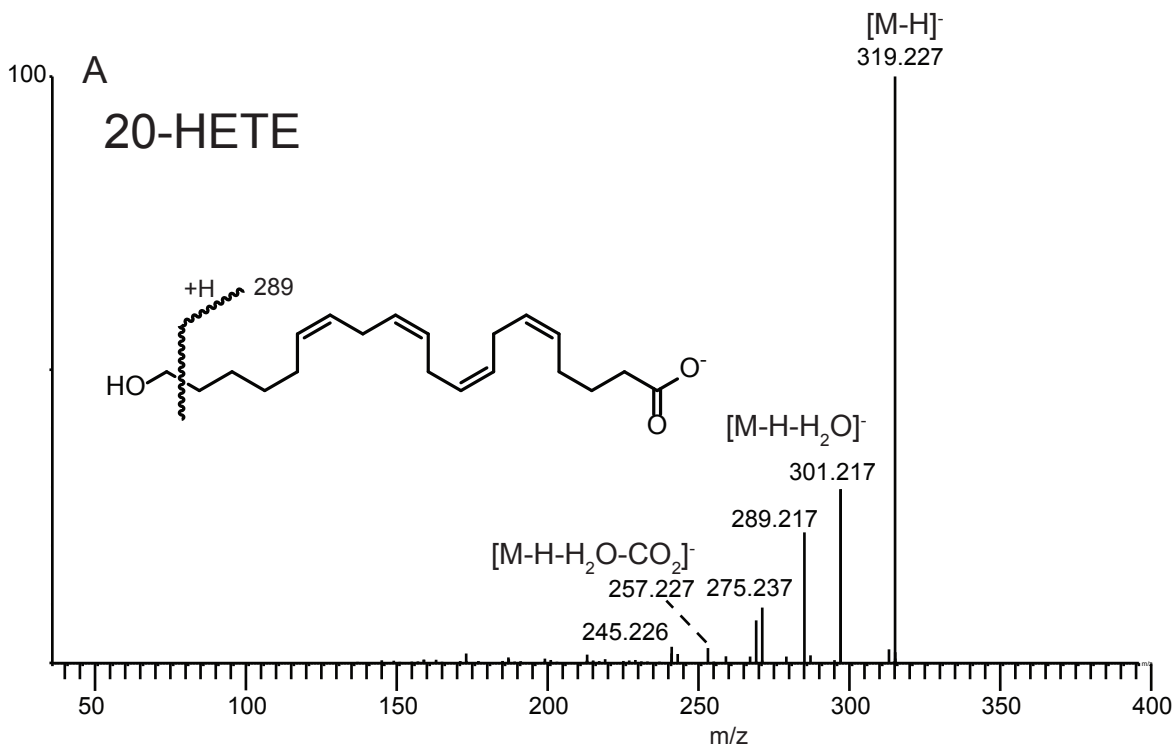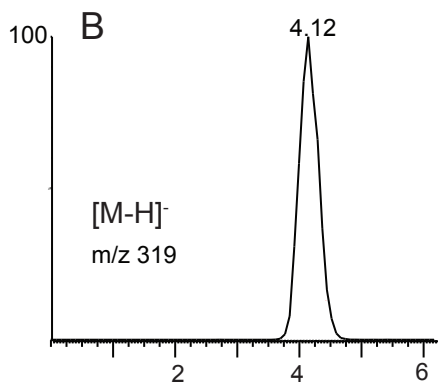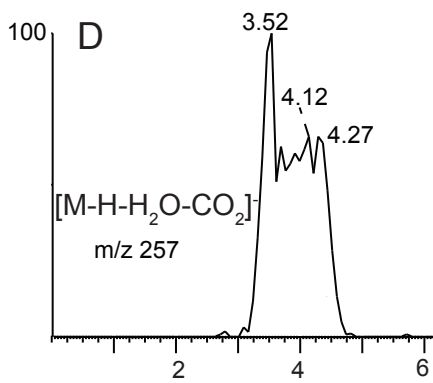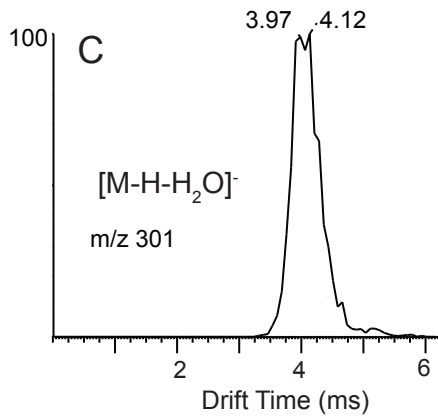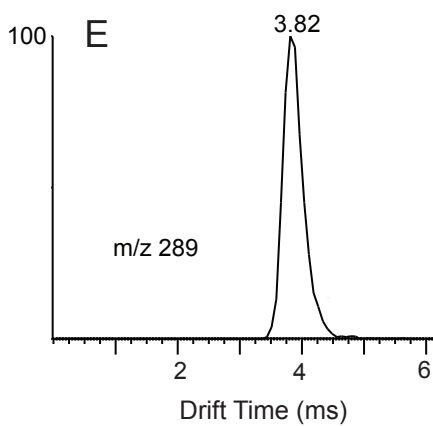

Supplement: NIHMS962359-supplement-13361_2018_1927_MOESM5_ESM.pdf [file NIHMS962359-supplement-13361_2018_1927_MOESM5_ESM.pdf]

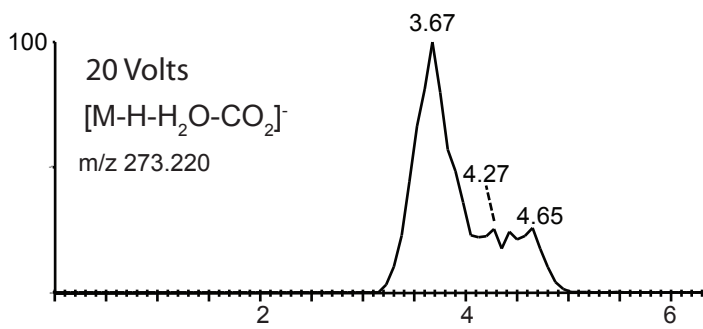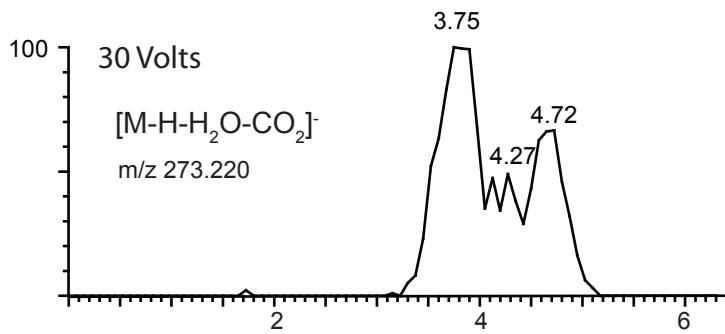

Supplement: NIHMS962359-supplement-13361_2018_1927_MOESM7_ESM.pdf [file NIHMS962359-supplement-13361_2018_1927_MOESM7_ESM.pdf]
